# Supplementary material for: Highly reactive α-bromoacrylate monomers and Michael acceptors obtained by Cu(ii)Br2-dibromination of acrylates and instantaneous E2 by a ligand
Source: Royal Society of Chemistry journal article supplement (doi:10.1039/c8py00155c), 2018-01-01
Supplement: c8py00155c1.pdf [file c8py00155c1.pdf]

## Electronic Supplementary Information

for

### Highly reactive $\alpha$ -bromoacrylate monomers and Michael acceptors by Cu(II)Br<sub>2</sub>- dibromination of acrylates and instantaneous E2 by ligand

Adrian Moreno,<sup>a,b</sup> Jānis Lejnieks,<sup>a</sup> Liang Ding,<sup>a</sup> Silvia Grama,<sup>a</sup> Marina Galià,<sup>b</sup>  
Gerard Lligadas,<sup>a,b</sup> and Virgil Percec<sup>a</sup>

<sup>a</sup>Roy & Diana Vagelos Laboratories, Department of Chemistry, University of Pennsylvania,  
Philadelphia, Pennsylvania 19104-6323, United States

<sup>b</sup>Laboratory of Sustainable Polymers, Department of Analytical Chemistry and Organic  
Chemistry, University Rovira i Virgili, Tarragona, Spain

\*Correspondence to: V. Percec (E-mail: [percec@sas.upenn.edu](mailto:percec@sas.upenn.edu))

## Experimental

### Materials

Methyl acrylate (MA) (99%) and butyl acrylate (BA) (99+%) both from Acros were passed over a short column of basic Al<sub>2</sub>O<sub>3</sub> before use to remove the radical inhibitor. Cu(II)Br<sub>2</sub> (99%, Alfa Aesar), Cu(II)Cl<sub>2</sub> (98%, Fluka), tris(2-aminoethyl)amine (TREN, 99%, Acros) and CDCl<sub>3</sub> (99.8%, Cambridge Isotope Laboratories Inc) were used as received. Acetonitrile (99.5+%, EMD Chemicals Inc) was distilled before use. Hexamethylated tris(2-aminoethyl)amine (Me<sub>6</sub>-TREN) was synthesized following a literature procedure.<sup>1</sup>

### Techniques

500 MHz <sup>1</sup>H-NMR spectra were recorded on a Bruker DRX500 NMR instrument at 28 °C in CDCl<sub>3</sub> containing tetramethylsilane (TMS) as internal standard.

### Typical procedure for the Cu(II)Br<sub>2</sub>-promoted dibromination of MA or BA in acetonitrile

Cu(II)Br<sub>2</sub> (0.1 g, 0.448 mmol) was weighted in a vial containing a magnetic stirring bar, both dried overnight in an oven, and deoxygenized by purging with N<sub>2</sub> for 10 min at 25 °C. In another vial acetonitrile (1 mL) and monomer (MA 21 μL, or BA 32 μL, 0.224 mmol) were added and the mixture was deoxygenized by bubbling with N<sub>2</sub> for 30 min at 0 °C. Then, the deoxygenized mixture of monomer and acetonitrile was transferred via a degassed syringe and added under N<sub>2</sub> on top of the Cu(II)Br<sub>2</sub>, to start the reaction. Samples of 0.1 mL were periodically withdrawn from the reaction mixture, diluted in CDCl<sub>3</sub>, filtered over cotton to immediately record the <sup>1</sup>H-NMR spectra. Further experiments showed that this reaction can be carried out in the presence of oxygen. The conversion of MA or BA onto methyl 2,3-dibromopropionate or butyl 2,3-dibromopropionate was calculated by comparison of integrals (J) from the <sup>1</sup>H-NMR spectra as follows:

$$\text{Conversion (\%)} = \left( \frac{\int Ha'}{\int Ha' + \int Ha} \right) * 100$$

### Typical procedure for the base-promoted dehydrobromination of methyl 2,3-dibromopropionate mediated by Me<sub>6</sub>-TREN or TREN

Methyl 2,3-dibromopropionate (1.89 μL, 0.015 mmol), 0.6 mL CDCl<sub>3</sub> and ligand (TREN 0.74 μL, or Me<sub>6</sub>-TREN 1.33 μL, 0.005 mmol) were placed in an NMR tube. The reactions were monitored by <sup>1</sup>H-NMR.

### References

<sup>1</sup>M. Ciampolini and N. Nardi, *Inorg. Chem.* 1966, **5**, 41–44.
